# Supplementary material for: Dual-functional porphyrinic zirconium-based metal–organic framework for the fluorescent sensing of histidine enantiomers and Hg2+
Source: Royal Society of Chemistry journal article supplement (doi:10.1039/d3ay02241b), 2024-01-01
Supplement: d3ay02241b1.pdf [file d3ay02241b1.pdf]

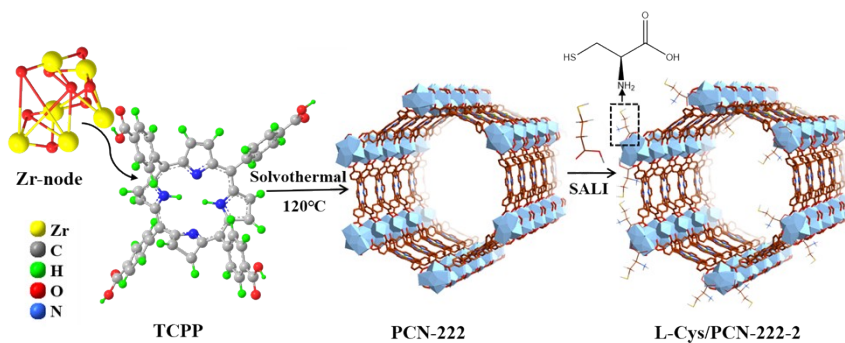

Fig. S1 Synthetic route of L-Cys/PCN-222-2 by SALI method

Tab. S1 Measurements of the fluorescence quantum yield of PCN-222 and L-Cys/PCN-2221, 2, 3

| Types           | $F_s$   | $A_s$ | $QY_s$ |
|-----------------|---------|-------|--------|
| PCN-222         | 17116.5 | 0.030 | 6.94 % |
| L-Cys/PCN-222-1 | 15910.3 | 0.030 | 6.17 % |
| L-Cys/PCN-222-2 | 15200.4 | 0.030 | 5.71 % |
| L-Cys/PCN-222-3 | 14539.8 | 0.030 | 5.15 % |

Tab. S2 Percentage of C, O, Zr and S elements in EDS of PCN-222 and L-Cys/PCN-222-2

| Element Content | C (%)  | O (%)  | Zr (%) | S (%) |
|-----------------|--------|--------|--------|-------|
| PCN-222         | 50.757 | 14.305 | 34.937 | /     |
| L-Cys/PCN-222-2 | 61.030 | 8.313  | 28.010 | 2.646 |

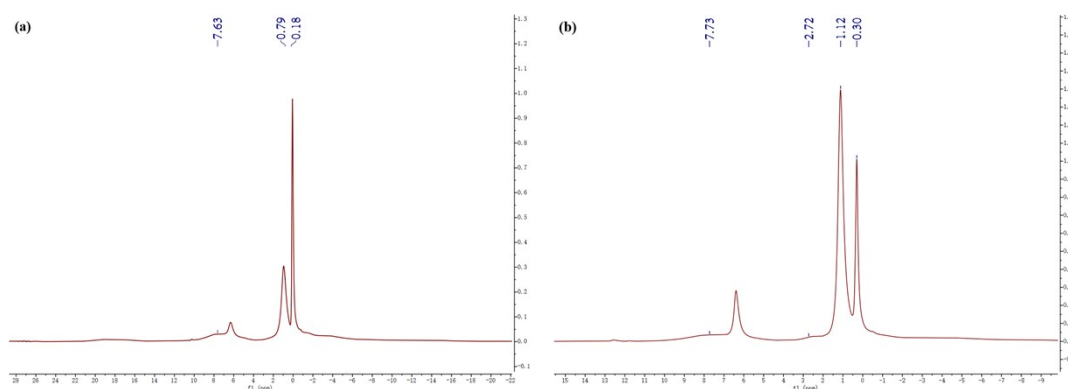

Fig. S2 Solid  $^1\text{H}$  NMR spectra of PCN-222(a) and L-Cys/PCN-222(b)

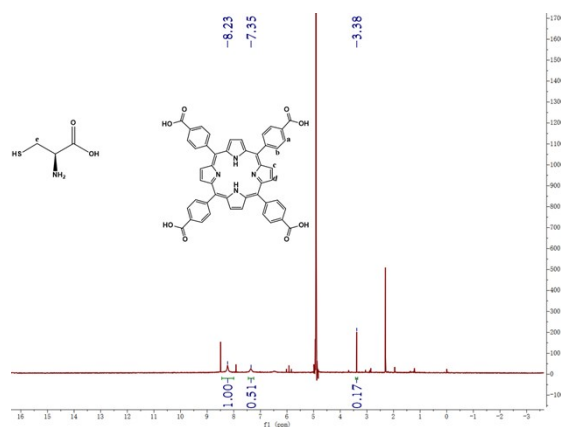

Fig. S3 Liquid  $^1\text{H}$  NMR spectrum of digested L-Cys/PCN-222 with a 1:2.6 PCN-222:L-Cys loading

Tab. S3 The specific surface area, average pore size and pore volume of PCN-222 and L-Cys/PCN-222-2

| Sample          | BET ( $\text{m}^2 \text{g}^{-1}$ ) | D (nm) | V ( $\text{cm}^3 \text{g}^{-1}$ ) |
|-----------------|------------------------------------|--------|-----------------------------------|
| PCN-222         | 1736                               | 2.77   | 1.012                             |
| L-Cys/PCN-222-2 | 1720                               | 2.53   | 0.969                             |

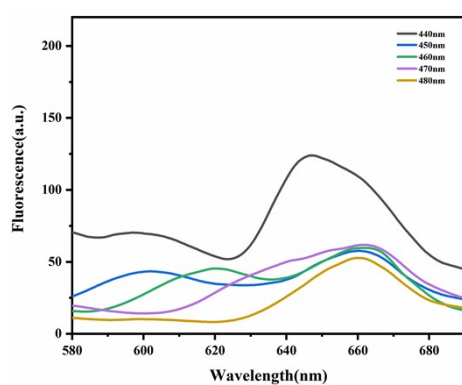

Fig. S4 The effects of excitation wavelengths on the fluorescence performance of TCPP

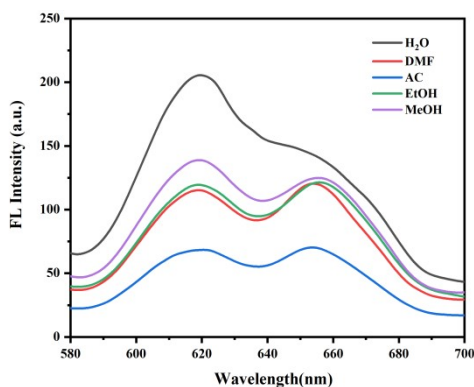

Fig. S5 The effects of solvent type on the fluorescence intensity of L-Cys/PCN-222-2 under the excitation wavelength at 460 nm

Tab.S4 The molecular structure, isoelectric point, Log *P*, molecular size (Å) and *Q<sub>R</sub>* of 11 chiral amino acids

| Category                | Compound name                                                                       | Molecular structure                                                                 | Isoelectric point | Log <i>P</i> | Molecular size (Å) | <i>Q<sub>R</sub></i> | $\frac{F_L/F_0}{F_D/F_0}$ |
|-------------------------|-------------------------------------------------------------------------------------|-------------------------------------------------------------------------------------|-------------------|--------------|--------------------|----------------------|---------------------------|
| Hydrophobic amino acids | Tryptophan                                                                          | 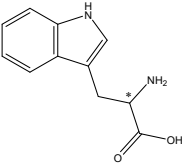   | 5.89              | -0.9         | 12.5×7.8×          | 1.01                 | 0.75                      |
|                         |                                                                                     |                                                                                     |                   |              | 6.9                |                      | 0.74                      |
|                         | Proline                                                                             |    | 6.30              | 0.15         | 8.3×5.5×5.         | 1.01                 | 0.86                      |
|                         |                                                                                     |                                                                                     |                   |              | 5                  |                      | 0.85                      |
|                         | α-Alanine                                                                           |   | 6.00              | 1.8          | 7.1×6.2×4.         | 1.00                 | 0.86                      |
|                         |                                                                                     |                                                                                     |                   |              | 5                  |                      | 0.86                      |
|                         | Phenylalanine                                                                       |  | 5.48              | 2.8          | 7.0×7.0×1          | 1.02                 | 0.88                      |
|                         |                                                                                     |                                                                                     |                   |              | 0.7                |                      | 0.86                      |
|                         | Isoleucine                                                                          |  | 6.02              | 4.5          | 8.4×7.5×5.         | 1.02                 | 0.84                      |
|                         |                                                                                     |                                                                                     |                   |              | 8                  |                      | 0.82                      |
|                         | Histidine                                                                           |  | 7.59              | -3.2         | 5.7×7.0×6.         | 1.10                 | 0.97                      |
| 9                       |                                                                                     |                                                                                     |                   |              | 0.88               |                      |                           |
| Glutamine               |  | 5.65                                                                                | -3.5              | 9.8×7.0×5.   | 1.02               | 0.84                 |                           |
|                         |                                                                                     |                                                                                     |                   | 6            |                    | 0.82                 |                           |
| Aspartic acid           |  | 2.97                                                                                | -3.5              | 8.9×6.9×5.   | 0.94               | 0.60                 |                           |
|                         |                                                                                     |                                                                                     |                   | 1            |                    |                      |                           |

Hydrophilic

|           |                                          |      |      |            |      |  |      |
|-----------|------------------------------------------|------|------|------------|------|--|------|
|           |                                          |      |      |            |      |  | 0.64 |
|           |                                          |      |      |            |      |  | 0.86 |
| Tyrosine  | <chem>N[C@@H](Cc1ccc(O)cc1)C(=O)O</chem> | 5.66 | -1.3 | 11.8×6.1×  | 0.96 |  | 0.90 |
|           |                                          |      |      |            |      |  |      |
| Serine    | <chem>N[C@@H](CO)C(=O)O</chem>           | 5.68 | -0.8 | 4.9×6.4×7. | 1.01 |  | 0.81 |
|           |                                          |      |      |            | 5    |  | 0.80 |
| Threonine | <chem>N[C@@H](C(C)O)C(=O)O</chem>        | 5.60 | -0.7 | 5.3×6.0×7. | 1.03 |  | 0.82 |
|           |                                          |      |      |            | 6    |  | 0.80 |

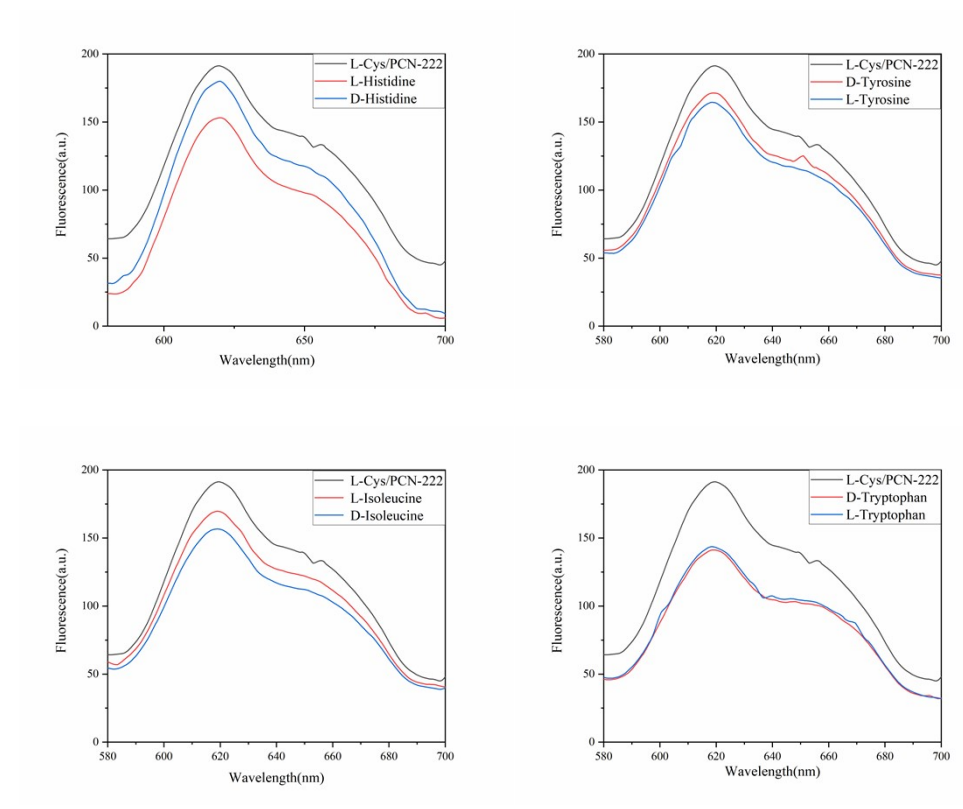

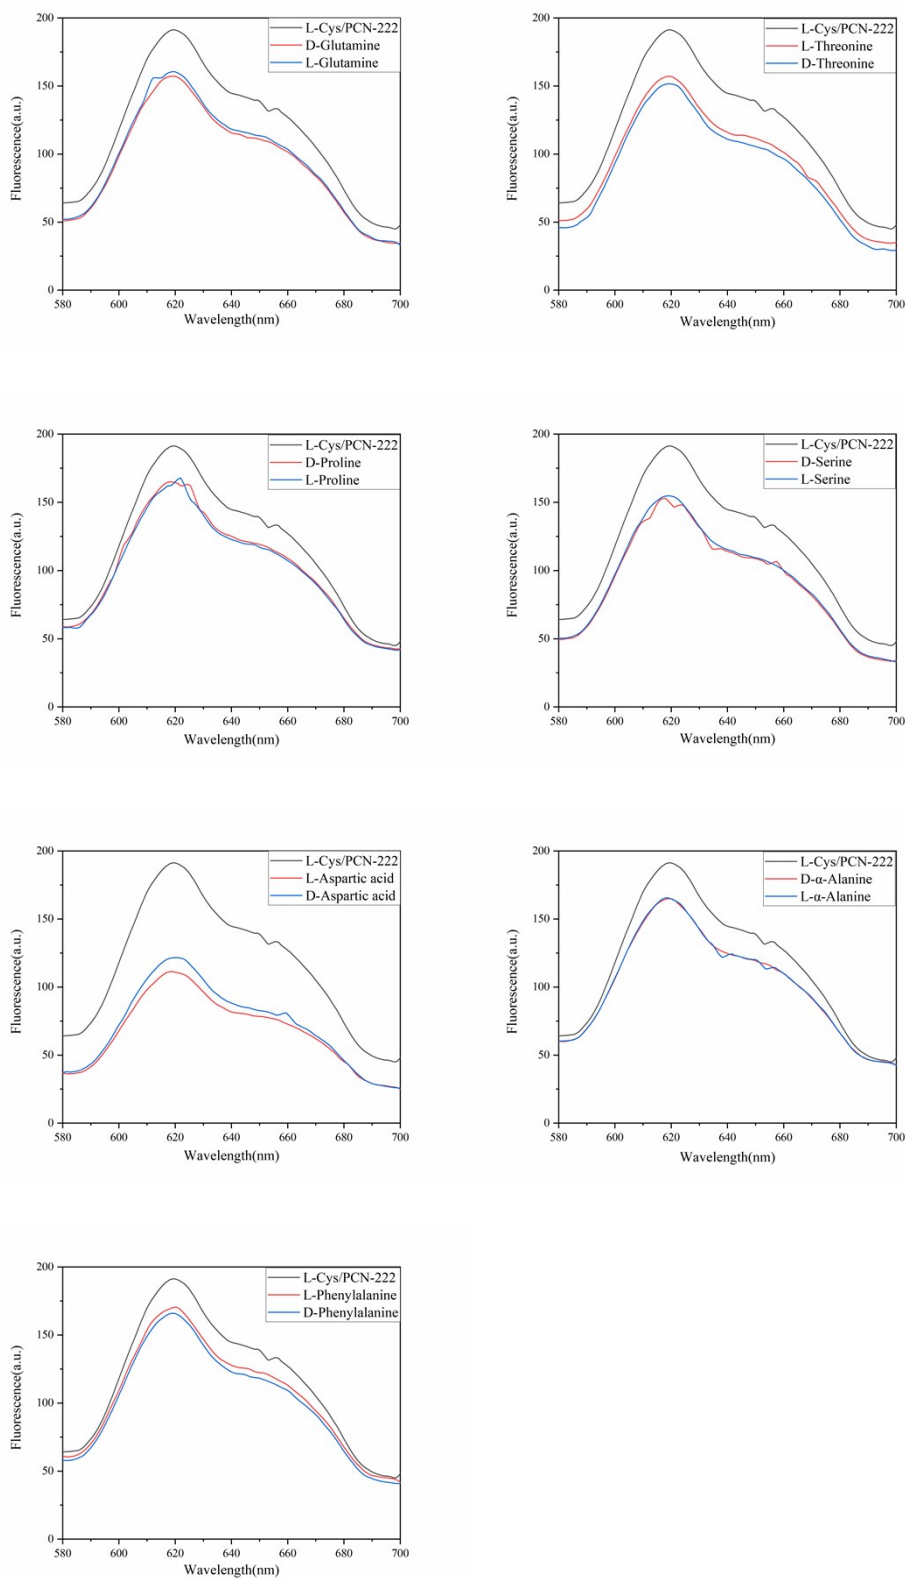

Fig. S6 The fluorescent spectra of L-Cys/PCN-222-2 quenched by 11 amino acids enantiomers

Tab. S5 The recoveries of D-/L-histidine under weak acidic or alkaline conditions

| Sample      | pH value | Spiked concentration ( $\mu\text{mol L}^{-1}$ ) | Measured concentration ( $\mu\text{mol L}^{-1}$ ) | Recovery (%) | RSD (%) |
|-------------|----------|-------------------------------------------------|---------------------------------------------------|--------------|---------|
| D-histidine |          | 5.00                                            | 3.21                                              | 67.51        | 6.38    |
| L-histidine |          |                                                 | 3.38                                              | 64.11        | 6.44    |
| D-histidine | pH=4.0   | 10.00                                           | 6.54                                              | 65.35        | 5.85    |
| L-histidine |          |                                                 | 6.65                                              | 66.45        | 5.73    |
| D-histidine |          | 40.00                                           | 28.53                                             | 71.33        | 3.86    |
| L-histidine |          |                                                 | 29.52                                             | 73.80        | 3.51    |
| D-histidine |          | 5.00                                            | 3.71                                              | 74.13        | 5.83    |
| L-histidine |          |                                                 | 3.82                                              | 76.49        | 5.90    |
| D-histidine | pH=5.0   | 10.00                                           | 7.71                                              | 77.10        | 5.55    |
| L-histidine |          |                                                 | 7.84                                              | 78.44        | 5.58    |
| D-histidine |          | 40.00                                           | 31.81                                             | 79.53        | 5.31    |
| L-histidine |          |                                                 | 31.92                                             | 79.81        | 5.43    |
| D-histidine |          | 5.00                                            | 4.26                                              | 85.12        | 7.10    |
| L-histidine |          |                                                 | 4.27                                              | 85.43        | 7.03    |
| D-histidine | pH=6.0   | 10.00                                           | 8.71                                              | 87.14        | 6.82    |
| L-histidine |          |                                                 | 8.73                                              | 87.33        | 6.88    |
| D-histidine |          | 40.00                                           | 35.32                                             | 88.31        | 6.31    |
| L-histidine |          |                                                 | 35.60                                             | 89.01        | 6.21    |
| D-histidine |          | 5.00                                            | 5.03                                              | 100.51       | 4.11    |
| L-histidine |          |                                                 | 5.05                                              | 100.90       | 4.20    |
| D-histidine | pH=7.0   | 10.00                                           | 9.95                                              | 99.48        | 3.91    |
| L-histidine |          |                                                 | 9.98                                              | 99.79        | 3.43    |
| D-histidine |          | 40.00                                           | 38.92                                             | 97.31        | 2.23    |
| L-histidine |          |                                                 | 39.14                                             | 97.85        | 2.45    |
| D-histidine | pH=8.0   | 5.00                                            | 4.17                                              | 83.47        | 4.14    |
| L-histidine |          |                                                 | 4.21                                              | 84.21        | 4.10    |

|             |       |       |       |      |
|-------------|-------|-------|-------|------|
| D-histidine |       | 8.23  | 82.33 | 3.74 |
| L-histidine | 10.00 | 8.38  | 83.81 | 3.50 |
| D-histidine |       | 32.40 | 80.99 | 2.63 |
| L-histidine | 40.00 | 32.45 | 81.12 | 2.41 |

Tab. S6 The recoveries and RSDs of Lake water sample (n=5)

| Actual sample | Analyte          | Blank sample ( $\mu\text{mol L}^{-1}$ ) | Spiked volume ( $\mu\text{mol L}^{-1}$ ) | Measured value ( $\mu\text{mol L}^{-1}$ ) | Recovery (%) | RSD (%) |
|---------------|------------------|-----------------------------------------|------------------------------------------|-------------------------------------------|--------------|---------|
|               |                  |                                         | 10.00                                    | 10.39                                     | 103.90       | 4.38    |
| Lake water    | $\text{Hg}^{2+}$ | —                                       | 25.00                                    | 24.87                                     | 99.48        | 3.95    |
|               |                  |                                         | 45.00                                    | 46.86                                     | 104.13       | 4.86    |

Tab. S7 The fluorescence lifetime of L-Cys/PCN-222-2 solution before and after L- and D-Histidine

| System components           | $\tau_1$ (ns) | $\tau_2$ (ns) | $T_{av}$ (ns) | $R^2$  |
|-----------------------------|---------------|---------------|---------------|--------|
| L-Cys/PCN-222-2             | 0.79988       | 0.7998        | 0.80          | 0.9927 |
| L-Cys/PCN-222-2+L-Histidine | 0.80386       | 0.80387       | 0.80          | 0.9975 |
| L-Cys/PCN-222+D-Histidine   | 0.83711       | 0.83716       | 0.84          | 0.9950 |

Tab. S8 The fluorescence lifetime of L-Cys/PCN-222-2 solution before and after  $\text{Hg}^{2+}$  addition

| System components                 | $\tau_1$ (ns) | $\tau_2$ (ns) | $T_{av}$ (ns) | $R^2$  |
|-----------------------------------|---------------|---------------|---------------|--------|
| L-Cys/PCN-222-2                   | 0.79988       | 0.7998        | 0.80          | 0.9927 |
| L-Cys/PCN-222-2+ $\text{Hg}^{2+}$ | 0.71326       | 0.71329       | 0.71          | 0.9916 |

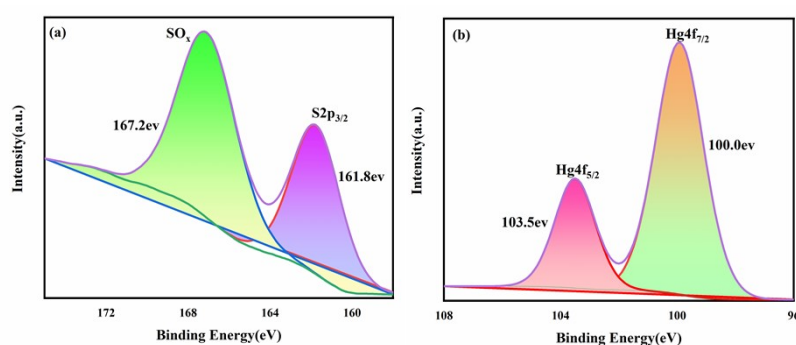

Fig. S7 XPS S2p spectrum (a) and Hg 4f spectrum(b) of L-Cys/PCN-222-2+ $\text{Hg}^{2+}$

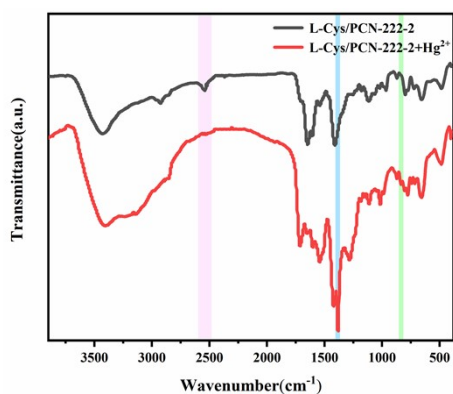

Fig. S8 The FT-IR spectra of L-Cys/PCN-222-2 and L-Cys/PCN-222-2+Hg<sup>2+</sup>

Tab. S9 Comparisons of L-Cys/PCN-222-2 with other PCN-222 series

| PCN-222 series  | Metal source | Analytes          | Concentration range (μmol L <sup>-1</sup> ) | LOD (μmol L <sup>-1</sup> ) | Post modification | Detected time (s) | Ref.      |
|-----------------|--------------|-------------------|---------------------------------------------|-----------------------------|-------------------|-------------------|-----------|
| PCN-222         | Zr           | F <sup>-</sup>    | 1 ~ 20                                      | 0.07                        | No                | <10               | 17        |
| PCN-222         | Zn           | Pentachlorophenol | 3 ~ 27                                      | 1.24                        | No                | 30                | 23        |
| PCN-222         | Zr           | Phosphate         | 0.25 ~ 25                                   | 0.023                       | No                | — <sup>a</sup>    | 24        |
| PCN-222         | Zr           | Chloramphenicol   | 3.1×10 <sup>-7</sup> ~ 3.1×10 <sup>-2</sup> | 2.50×10 <sup>-7</sup>       | No                | 60                | 21        |
| Fe@PCN-222      | Fe           | Glucose           | 10 ~ 300                                    | 2.41                        | Yes               | — <sup>a</sup>    | 22        |
| L-Cys/PCN-222-2 | Zr           | D-/L-Histidine    | 5~45                                        | 3.85/2.48                   |                   | 40                | This work |
|                 |              | Hg <sup>2+</sup>  | 10~500                                      | 2.79                        | Yes               |                   |           |

—<sup>a</sup> noted that there was no involvement of detected time in the references.
